# Supplementary material for: Microsatellite Tandem Repeats Are Abundant in Human Promoters and Are Associated with Regulatory Elements
Source: PubMed Central journal article supplement (PMC3566118; doi:10.1371/journal.pone.0054710), 2013-02-06
Supplement: pone.0054710.s004.pdf [file pone.0054710.s004.pdf]

**Table S4: Full Gene ontology results from GREAT analysis  
From Sawaya et al. PLOS ONE**

GREAT Table Output: Genomic Regions Enrichment of Annotations Tool, Bejerano Lab, Stanford University

| Ontology                                         | # Term Name                                                                                                                                                                                       | Hyper Rank | Hyper Raw P-Value | Hyper FDR Q-Val | Hyper Fold Enrichment | Hyper Foreground Region Hits | Hyper Total Regions | Hyper Region Set Coverage | Hyper Foreground Gene Hits | Total Genes Annotated |
|--------------------------------------------------|---------------------------------------------------------------------------------------------------------------------------------------------------------------------------------------------------|------------|-------------------|-----------------|-----------------------|------------------------------|---------------------|---------------------------|----------------------------|-----------------------|
| GO Molecular Function                            | cell adhesion molecule binding                                                                                                                                                                    | 17         | 7.02521e-6        | 1.40587e-3      | 2.5962                | 27                           | 246                 | 0.18%                     | 21                         | 50                    |
|                                                  | activating transcription factor binding                                                                                                                                                           | 19         | 1.58066e-5        | 2.83022e-3      | 2.9568                | 20                           | 160                 | 0.13%                     | 14                         | 29                    |
|                                                  | extracellular matrix constituent, lubricant activity                                                                                                                                              | 21         | 6.55555e-5        | 1.06200e-2      | 4.9510                | 9                            | 43                  | 0.06%                     | 2                          | 5                     |
|                                                  | oxidoreductase activity, acting on paired donors, with incorporation or reduction of molecular oxygen, 2-oxoglutarate as one donor, and incorporation of one atom each of oxygen into both donors | 22         | 7.04751e-5        | 1.08980e-2      | 2.8386                | 18                           | 150                 | 0.12%                     | 14                         | 46                    |
|                                                  | RNA polymerase II transcription factor binding transcription factor activity                                                                                                                      | 24         | 8.45354e-5        | 1.19829e-2      | 2.4397                | 23                           | 223                 | 0.15%                     | 17                         | 57                    |
|                                                  | RNA polymerase II transcription cofactor activity                                                                                                                                                 | 25         | 9.80460e-5        | 1.33421e-2      | 2.5344                | 21                           | 196                 | 0.14%                     | 15                         | 52                    |
|                                                  | cadherin binding                                                                                                                                                                                  | 28         | 1.27618e-4        | 1.55056e-2      | 3.1843                | 14                           | 104                 | 0.09%                     | 10                         | 23                    |
| phospholipase binding                            | 30                                                                                                                                                                                                | 1.96870e-4 | 2.23251e-2        | 3.9424          | 10                    | 60                           | 0.07%               | 6                         | 13                         |                       |
| GO Biological Process                            | signal release                                                                                                                                                                                    | 97         | 3.76048e-9        | 3.39684e-7      | 2.1533                | 69                           | 758                 | 0.46%                     | 52                         | 131                   |
|                                                  | cartilage development                                                                                                                                                                             | 112        | 2.91686e-8        | 2.28192e-6      | 2.0690                | 67                           | 766                 | 0.45%                     | 41                         | 119                   |
|                                                  | negative regulation of B cell activation                                                                                                                                                          | 151        | 1.00799e-6        | 5.84903e-5      | 4.4914                | 15                           | 79                  | 0.10%                     | 11                         | 25                    |
|                                                  | multicellular organismal homeostasis                                                                                                                                                              | 166        | 2.28208e-6        | 1.20456e-4      | 2.1504                | 44                           | 484                 | 0.29%                     | 27                         | 103                   |
|                                                  | regulation of ion transmembrane transporter activity                                                                                                                                              | 171        | 3.64953e-6        | 1.87001e-4      | 2.1324                | 43                           | 477                 | 0.29%                     | 32                         | 77                    |
|                                                  | camera-type eye morphogenesis                                                                                                                                                                     | 190        | 1.13103e-5        | 5.21582e-4      | 2.0009                | 45                           | 532                 | 0.30%                     | 30                         | 79                    |
|                                                  | neurotransmitter secretion                                                                                                                                                                        | 191        | 1.13316e-5        | 5.19828e-4      | 2.1208                | 39                           | 435                 | 0.26%                     | 29                         | 69                    |
|                                                  | spinal cord anterior/posterior patterning                                                                                                                                                         | 194        | 1.27592e-5        | 5.76268e-4      | 10.1377               | 6                            | 14                  | 0.04%                     | 1                          | 2                     |
|                                                  | tissue homeostasis                                                                                                                                                                                | 209        | 2.58820e-5        | 1.08506e-3      | 2.1131                | 36                           | 403                 | 0.24%                     | 21                         | 76                    |
|                                                  | regulation of long-term neuronal synaptic plasticity                                                                                                                                              | 216        | 3.09096e-5        | 1.25384e-3      | 3.0197                | 18                           | 141                 | 0.12%                     | 13                         | 25                    |
|                                                  | hormone secretion                                                                                                                                                                                 | 217        | 3.52367e-5        | 1.42278e-3      | 2.2221                | 31                           | 330                 | 0.21%                     | 22                         | 56                    |
|                                                  | hormone transport                                                                                                                                                                                 | 224        | 4.50599e-5        | 1.76257e-3      | 2.1627                | 32                           | 350                 | 0.21%                     | 23                         | 62                    |
|                                                  | negative regulation of synaptic transmission, glutamatergic                                                                                                                                       | 235        | 1.01203e-4        | 3.77337e-3      | 6.1327                | 7                            | 27                  | 0.05%                     | 3                          | 8                     |
|                                                  | elevation of cytosolic calcium ion concentration involved in G-protein signaling coupled to IP3 second messenger                                                                                  | 237        | 1.06300e-4        | 3.92996e-3      | 5.2566                | 8                            | 36                  | 0.05%                     | 5                          | 12                    |
|                                                  | peptide hormone secretion                                                                                                                                                                         | 238        | 1.14793e-4        | 4.22613e-3      | 2.2528                | 26                           | 273                 | 0.17%                     | 18                         | 45                    |
|                                                  | cellular response to interleukin-6                                                                                                                                                                | 242        | 1.30013e-4        | 4.70733e-3      | 5.9137                | 7                            | 28                  | 0.05%                     | 5                          | 8                     |
|                                                  | epithelial structure maintenance                                                                                                                                                                  | 252        | 1.73448e-4        | 6.03077e-3      | 3.0950                | 14                           | 107                 | 0.09%                     | 5                          | 12                    |
|                                                  | positive regulation of ion transport                                                                                                                                                              | 254        | 1.84805e-4        | 6.37505e-3      | 2.0569                | 30                           | 345                 | 0.20%                     | 22                         | 74                    |
|                                                  | regulation of defense response to virus                                                                                                                                                           | 261        | 2.22529e-4        | 7.47051e-3      | 2.2859                | 23                           | 238                 | 0.15%                     | 15                         | 54                    |
|                                                  | regulation of cartilage development                                                                                                                                                               | 262        | 2.28094e-4        | 7.62808e-3      | 2.0600                | 29                           | 333                 | 0.19%                     | 16                         | 44                    |
|                                                  | peptide secretion                                                                                                                                                                                 | 266        | 2.40529e-4        | 7.92300e-3      | 2.1504                | 26                           | 286                 | 0.17%                     | 18                         | 48                    |
|                                                  | positive regulation of developmental growth                                                                                                                                                       | 275        | 2.83105e-4        | 9.02023e-3      | 2.2482                | 23                           | 242                 | 0.15%                     | 17                         | 39                    |
|                                                  | response to interleukin-6                                                                                                                                                                         | 277        | 3.03532e-4        | 9.60126e-3      | 4.0941                | 9                            | 52                  | 0.06%                     | 7                          | 13                    |
|                                                  | muscle cell fate determination                                                                                                                                                                    | 294        | 3.96946e-4        | 1.18301e-2      | 5.9137                | 6                            | 24                  | 0.04%                     | 2                          | 3                     |
|                                                  | regulation of synapse structure and activity                                                                                                                                                      | 296        | 4.07177e-4        | 1.20530e-2      | 2.1504                | 24                           | 264                 | 0.16%                     | 17                         | 44                    |
|                                                  | regulation of response to biotic stimulus                                                                                                                                                         | 300        | 4.46555e-4        | 1.30424e-2      | 2.0340                | 27                           | 314                 | 0.18%                     | 19                         | 69                    |
|                                                  | response to selenium ion                                                                                                                                                                          | 305        | 4.72865e-4        | 1.35844e-2      | 4.8701                | 7                            | 34                  | 0.05%                     | 4                          | 10                    |
|                                                  | response to electrical stimulus                                                                                                                                                                   | 307        | 5.26628e-4        | 1.50303e-2      | 2.5747                | 16                           | 147                 | 0.11%                     | 14                         | 31                    |
|                                                  | regulation of release of sequestered calcium ion into cytosol                                                                                                                                     | 312        | 5.72848e-4        | 1.60875e-2      | 2.7597                | 14                           | 120                 | 0.09%                     | 8                          | 25                    |
|                                                  | positive regulation of axon extension                                                                                                                                                             | 314        | 5.77057e-4        | 1.61025e-2      | 2.6479                | 15                           | 134                 | 0.10%                     | 10                         | 23                    |
|                                                  | activation of protein kinase C activity by G-protein coupled receptor protein signaling pathway                                                                                                   | 316        | 5.88207e-4        | 1.63097e-2      | 2.4670                | 17                           | 163                 | 0.11%                     | 10                         | 38                    |
|                                                  | cellular component disassembly involved in apoptosis                                                                                                                                              | 317        | 6.09384e-4        | 1.68436e-2      | 2.0231                | 26                           | 304                 | 0.17%                     | 19                         | 72                    |
|                                                  | negative regulation of B cell proliferation                                                                                                                                                       | 318        | 6.31417e-4        | 1.73977e-2      | 5.4588                | 6                            | 26                  | 0.04%                     | 4                          | 12                    |
|                                                  | histone H4 acetylation                                                                                                                                                                            | 322        | 6.74427e-4        | 1.83519e-2      | 2.6090                | 15                           | 136                 | 0.10%                     | 10                         | 33                    |
|                                                  | mammary placode formation                                                                                                                                                                         | 323        | 6.81452e-4        | 1.84857e-2      | 4.5995                | 7                            | 36                  | 0.05%                     | 3                          | 4                     |
|                                                  | muscle cell fate commitment                                                                                                                                                                       | 326        | 6.99645e-4        | 1.88046e-2      | 3.6705                | 9                            | 58                  | 0.06%                     | 4                          | 11                    |
| interleukin-6-mediated signaling pathway         | 327                                                                                                                                                                                               | 7.27653e-4 | 1.94975e-2        | 6.5707          | 5                     | 18                           | 0.03%               | 3                         | 5                          |                       |
| cell aging                                       | 328                                                                                                                                                                                               | 7.27719e-4 | 1.94399e-2        | 2.0644          | 24                    | 275                          | 0.16%               | 15                        | 55                         |                       |
| retinal ganglion cell axon guidance              | 330                                                                                                                                                                                               | 7.45735e-4 | 1.98004e-2        | 3.1349          | 11                    | 83                           | 0.07%               | 7                         | 15                         |                       |
| regulation of neuronal synaptic plasticity       | 340                                                                                                                                                                                               | 9.34529e-4 | 2.40834e-2        | 2.0275          | 24                    | 280                          | 0.16%               | 17                        | 44                         |                       |
| synaptic vesicle docking involved in exocytosis  | 341                                                                                                                                                                                               | 9.56908e-4 | 2.45878e-2        | 4.3574          | 7                     | 38                           | 0.05%               | 4                         | 7                          |                       |
| central nervous system neuron development        | 344                                                                                                                                                                                               | 9.95723e-4 | 2.53620e-2        | 2.1801          | 20                    | 217                          | 0.13%               | 11                        | 41                         |                       |
| peripheral nervous system neuron development     | 347                                                                                                                                                                                               | 1.00697e-3 | 2.54266e-2        | 3.0256          | 11                    | 86                           | 0.07%               | 3                         | 10                         |                       |
| regulation of calcium ion transport into cytosol | 356                                                                                                                                                                                               | 1.12707e-3 | 2.77398e-2        | 2.2648          | 18                    | 188                          | 0.12%               | 11                        | 40                         |                       |
| tight junction assembly                          | 357                                                                                                                                                                                               | 1.13249e-3 | 2.77951e-2        | 2.4813          | 15                    | 143                          | 0.10%               | 9                         | 31                         |                       |
| monocyte chemotaxis                              | 358                                                                                                                                                                                               | 1.16858e-3 | 2.86008e-2        | 4.8941          | 6                     | 29                           | 0.04%               | 4                         | 8                          |                       |
| ventricular cardiac muscle cell differentiation  | 364                                                                                                                                                                                               | 1.21897e-3 | 2.93424e-2        | 3.1539          | 10                    | 75                           | 0.07%               | 7                         | 17                         |                       |

|                       |                                                                                                |     |            |            |         |    |     |       |    |     |
|-----------------------|------------------------------------------------------------------------------------------------|-----|------------|------------|---------|----|-----|-------|----|-----|
|                       | response to cholesterol                                                                        | 369 | 1.27371e-3 | 3.02445e-2 | 3.7105  | 8  | 51  | 0.05% | 5  | 12  |
|                       | transcription initiation from RNA polymerase II promoter                                       | 371 | 1.29986e-3 | 3.06990e-2 | 2.0488  | 22 | 254 | 0.15% | 18 | 69  |
|                       | positive regulation of calcium ion transport                                                   | 371 | 1.29986e-3 | 3.06990e-2 | 2.0488  | 22 | 254 | 0.15% | 16 | 57  |
|                       | spleen development                                                                             | 377 | 1.36187e-3 | 3.16517e-2 | 2.5280  | 14 | 131 | 0.09% | 11 | 24  |
|                       | ectodermal placode formation                                                                   | 378 | 1.39289e-3 | 3.22872e-2 | 2.7559  | 12 | 103 | 0.08% | 7  | 17  |
|                       | retina morphogenesis in camera-type eye                                                        | 381 | 1.40214e-3 | 3.22455e-2 | 2.3508  | 16 | 161 | 0.11% | 12 | 31  |
|                       | cellular response to lipid                                                                     | 384 | 1.46844e-3 | 3.35065e-2 | 2.8911  | 11 | 90  | 0.07% | 7  | 21  |
|                       | regulation of erythrocyte differentiation                                                      | 385 | 1.47193e-3 | 3.34989e-2 | 2.2719  | 17 | 177 | 0.11% | 12 | 29  |
|                       | apical junction assembly                                                                       | 390 | 1.59450e-3 | 3.58232e-2 | 2.3219  | 16 | 163 | 0.11% | 10 | 35  |
|                       | regulation of amyloid precursor protein biosynthetic process                                   | 396 | 1.68497e-3 | 3.72820e-2 | 4.5783  | 6  | 31  | 0.04% | 3  | 5   |
|                       | histone ubiquitination                                                                         | 401 | 1.75734e-3 | 3.83985e-2 | 2.5626  | 13 | 120 | 0.09% | 10 | 28  |
|                       | positive regulation of small GTPase mediated signal transduction                               | 401 | 1.75734e-3 | 3.83985e-2 | 2.5626  | 13 | 120 | 0.09% | 9  | 28  |
|                       | dendrite morphogenesis                                                                         | 403 | 1.76380e-3 | 3.83484e-2 | 2.2340  | 17 | 180 | 0.11% | 11 | 27  |
|                       | protein oxidation                                                                              | 405 | 1.78707e-3 | 3.86624e-2 | 23.6546 | 2  | 2   | 0.01% | 1  | 1   |
|                       | activation of phospholipase D activity by G-protein coupled receptor protein signaling pathway | 405 | 1.78707e-3 | 3.86624e-2 | 23.6546 | 2  | 2   | 0.01% | 1  | 1   |
|                       | protein kinase C deactivation                                                                  | 405 | 1.78707e-3 | 3.86624e-2 | 23.6546 | 2  | 2   | 0.01% | 1  | 1   |
|                       | prepulse inhibition                                                                            | 408 | 1.79720e-3 | 3.85957e-2 | 3.2256  | 9  | 66  | 0.06% | 5  | 13  |
|                       | regulation of chondrocyte differentiation                                                      | 409 | 1.80599e-3 | 3.86896e-2 | 2.0750  | 20 | 228 | 0.13% | 9  | 31  |
|                       | negative regulation of transporter activity                                                    | 412 | 1.89389e-3 | 4.02774e-2 | 2.5414  | 13 | 121 | 0.09% | 10 | 24  |
|                       | negative regulation of ion transmembrane transporter activity                                  | 413 | 1.91772e-3 | 4.06853e-2 | 2.7979  | 11 | 93  | 0.07% | 8  | 17  |
|                       | fat-soluble vitamin metabolic process                                                          | 416 | 1.92425e-3 | 4.05295e-2 | 2.2800  | 16 | 166 | 0.11% | 14 | 45  |
|                       | angiogenesis involved in wound healing                                                         | 417 | 1.94215e-3 | 4.08085e-2 | 5.3760  | 5  | 22  | 0.03% | 4  | 6   |
|                       | cell differentiation involved in metanephros development                                       | 420 | 1.99925e-3 | 4.17081e-2 | 3.1775  | 9  | 67  | 0.06% | 5  | 8   |
|                       | distal tubule development                                                                      | 421 | 2.00028e-3 | 4.16306e-2 | 4.4352  | 6  | 32  | 0.04% | 3  | 5   |
|                       | renal system process                                                                           | 422 | 2.00143e-3 | 4.15557e-2 | 2.0569  | 20 | 230 | 0.13% | 13 | 49  |
|                       | cellular response to osmotic stress                                                            | 423 | 2.03250e-3 | 4.21011e-2 | 3.8507  | 7  | 43  | 0.05% | 5  | 7   |
|                       | negative regulation of insulin secretion                                                       | 432 | 2.22020e-3 | 4.50310e-2 | 2.3191  | 15 | 153 | 0.10% | 10 | 27  |
|                       | interleukin-12-mediated signaling pathway                                                      | 434 | 2.27112e-3 | 4.58514e-2 | 6.7585  | 4  | 14  | 0.03% | 2  | 3   |
|                       | myoblast proliferation                                                                         | 438 | 2.32522e-3 | 4.65150e-2 | 10.1377 | 3  | 7   | 0.02% | 2  | 4   |
|                       | glutamate catabolic process                                                                    | 442 | 2.39588e-3 | 4.74948e-2 | 5.1423  | 5  | 23  | 0.03% | 3  | 5   |
|                       | negative regulation of cytokine biosynthetic process                                           | 446 | 2.45082e-3 | 4.81481e-2 | 2.2263  | 16 | 170 | 0.11% | 11 | 24  |
|                       |                                                                                                |     |            |            |         |    |     |       |    |     |
| GO Cellular Component | AP-2 adaptor complex                                                                           | 46  | 4.06640e-4 | 9.90963e-3 | 3.9424  | 9  | 54  | 0.06% | 6  | 9   |
|                       | clathrin coat of endocytic vesicle                                                             | 55  | 9.00428e-4 | 1.83524e-2 | 3.5482  | 9  | 60  | 0.06% | 6  | 10  |
|                       | clathrin sculpted gamma-aminobutyric acid transport vesicle membrane                           | 59  | 1.11481e-3 | 2.11814e-2 | 3.7847  | 8  | 50  | 0.05% | 4  | 8   |
|                       | inner mucus layer                                                                              | 63  | 1.55454e-3 | 2.76609e-2 | 5.6320  | 5  | 21  | 0.03% | 1  | 1   |
|                       | outer mucus layer                                                                              | 63  | 1.55454e-3 | 2.76609e-2 | 5.6320  | 5  | 21  | 0.03% | 1  | 1   |
|                       | SAGA-type complex                                                                              | 66  | 1.89389e-3 | 3.21675e-2 | 2.5414  | 13 | 121 | 0.09% | 7  | 27  |
|                       | clathrin coat of coated pit                                                                    | 70  | 2.21900e-3 | 3.55356e-2 | 3.1308  | 9  | 68  | 0.06% | 6  | 14  |
|                       | clathrin-coated endocytic vesicle membrane                                                     | 72  | 2.45752e-3 | 3.82622e-2 | 3.0854  | 9  | 69  | 0.06% | 6  | 14  |
|                       |                                                                                                |     |            |            |         |    |     |       |    |     |
| Mouse Phenotype       | abnormal aggression-related behavior                                                           | 69  | 3.49871e-8 | 3.69849e-6 | 2.8012  | 36 | 304 | 0.24% | 27 | 73  |
|                       | weakness                                                                                       | 73  | 9.97917e-8 | 9.97097e-6 | 2.1720  | 55 | 599 | 0.37% | 35 | 112 |
|                       | decreased aggression                                                                           | 112 | 1.28188e-6 | 8.34824e-5 | 3.3564  | 21 | 148 | 0.14% | 14 | 41  |
|                       | decreased aggression towards mice                                                              | 116 | 1.52081e-6 | 9.56274e-5 | 4.1138  | 16 | 92  | 0.11% | 10 | 24  |
|                       | abnormal heart right ventricle size                                                            | 122 | 2.18638e-6 | 1.30717e-4 | 2.1332  | 45 | 499 | 0.30% | 32 | 90  |
|                       | abnormal presacral vertebrae                                                                   | 127 | 2.64655e-6 | 1.52000e-4 | 4.1743  | 15 | 85  | 0.10% | 3  | 5   |
|                       | increased lumbar vertebrae number                                                              | 131 | 2.84437e-6 | 1.58373e-4 | 4.7309  | 13 | 65  | 0.09% | 2  | 5   |
|                       | cervical vertebral transformation                                                              | 135 | 3.57238e-6 | 1.93014e-4 | 2.4942  | 31 | 294 | 0.21% | 21 | 45  |
|                       | increased presacral vertebrae number                                                           | 139 | 4.06086e-6 | 2.13093e-4 | 4.5897  | 13 | 67  | 0.09% | 2  | 3   |
|                       | abnormal palatal shelf elevation                                                               | 148 | 6.70991e-6 | 3.30690e-4 | 2.5036  | 29 | 274 | 0.19% | 16 | 39  |
|                       | increased heart right ventricle size                                                           | 158 | 1.07905e-5 | 4.98138e-4 | 2.1026  | 40 | 450 | 0.27% | 28 | 80  |
|                       | increased cell proliferation                                                                   | 173 | 1.77046e-5 | 7.46460e-4 | 2.0375  | 41 | 476 | 0.27% | 24 | 86  |
|                       | fused carpal bones                                                                             | 178 | 2.00179e-5 | 8.20285e-4 | 3.2430  | 17 | 124 | 0.11% | 6  | 16  |
|                       | abnormal circulating dihydrotestosterone level                                                 | 188 | 2.84352e-5 | 1.10323e-3 | 11.8273 | 5  | 10  | 0.03% | 3  | 3   |
|                       | domed cranium                                                                                  | 192 | 3.17143e-5 | 1.20481e-3 | 2.0691  | 37 | 423 | 0.25% | 22 | 69  |
|                       | abnormal pituitary gland development                                                           | 193 | 3.33284e-5 | 1.25957e-3 | 2.5907  | 23 | 210 | 0.15% | 15 | 30  |
|                       | abnormal patella morphology                                                                    | 198 | 4.10366e-5 | 1.51172e-3 | 2.9568  | 18 | 144 | 0.12% | 7  | 20  |
|                       | scaly skin                                                                                     | 201 | 4.45584e-5 | 1.61696e-3 | 2.4336  | 25 | 243 | 0.17% | 17 | 54  |
|                       | jerky movement                                                                                 | 202 | 4.50658e-5 | 1.62728e-3 | 3.7049  | 13 | 83  | 0.09% | 7  | 17  |
|                       | micrognathia                                                                                   | 209 | 5.44802e-5 | 1.90133e-3 | 2.4039  | 25 | 246 | 0.17% | 17 | 34  |
|                       | thin uterus                                                                                    | 210 | 5.46214e-5 | 1.89718e-3 | 5.7344  | 8  | 33  | 0.05% | 5  | 10  |

|  |                                                                  |     |            |            |         |    |     |       |    |    |
|--|------------------------------------------------------------------|-----|------------|------------|---------|----|-----|-------|----|----|
|  | abnormal neocortex morphology                                    | 211 | 5.48779e-5 | 1.89706e-3 | 3.0010  | 17 | 134 | 0.11% | 9  | 25 |
|  | decreased circulating dihydrotestosterone level                  | 227 | 7.55387e-5 | 2.42722e-3 | 23.6546 | 3  | 3   | 0.02% | 1  | 1  |
|  | absent femur                                                     | 228 | 7.78070e-5 | 2.48914e-3 | 6.3685  | 7  | 26  | 0.05% | 4  | 4  |
|  | increased neurofibrosarcoma incidence                            | 229 | 7.93255e-5 | 2.52664e-3 | 4.8384  | 9  | 44  | 0.06% | 6  | 9  |
|  | absent sacral vertebrae                                          | 234 | 8.30296e-5 | 2.58811e-3 | 3.3116  | 14 | 100 | 0.09% | 3  | 9  |
|  | decreased prepulse inhibition                                    | 241 | 9.47000e-5 | 2.86615e-3 | 2.4781  | 22 | 210 | 0.15% | 12 | 40 |
|  | prostate gland hyperplasia                                       | 242 | 9.54443e-5 | 2.87674e-3 | 4.7309  | 9  | 45  | 0.06% | 7  | 10 |
|  | intestinal adenocarcinoma                                        | 244 | 9.67834e-5 | 2.89319e-3 | 2.4180  | 23 | 225 | 0.15% | 13 | 43 |
|  | abnormal branchial arch artery morphology                        | 249 | 1.09888e-4 | 3.21896e-3 | 2.0625  | 32 | 367 | 0.21% | 21 | 52 |
|  | decreased startle reflex                                         | 250 | 1.10047e-4 | 3.21072e-3 | 2.3010  | 25 | 257 | 0.17% | 15 | 54 |
|  | pancreatic ductal adenocarcinoma                                 | 252 | 1.14220e-4 | 3.30603e-3 | 4.6281  | 9  | 46  | 0.06% | 6  | 12 |
|  | small lung saccule                                               | 252 | 1.14220e-4 | 3.30603e-3 | 4.6281  | 9  | 46  | 0.06% | 4  | 8  |
|  | abnormal neural plate morphology                                 | 255 | 1.17012e-4 | 3.34700e-3 | 2.2921  | 25 | 258 | 0.17% | 16 | 35 |
|  | paraparesis                                                      | 256 | 1.18244e-4 | 3.36902e-3 | 3.0588  | 15 | 116 | 0.10% | 8  | 24 |
|  | decreased pancreatic acinar cell number                          | 260 | 1.30606e-4 | 3.66400e-3 | 5.1145  | 8  | 37  | 0.05% | 2  | 6  |
|  | muscle spasm                                                     | 264 | 1.36185e-4 | 3.76263e-3 | 2.0933  | 30 | 339 | 0.20% | 20 | 61 |
|  | muscle twitch                                                    | 264 | 1.36185e-4 | 3.76263e-3 | 2.0933  | 30 | 339 | 0.20% | 20 | 62 |
|  | ascites                                                          | 271 | 1.56114e-4 | 4.20183e-3 | 2.5164  | 20 | 188 | 0.13% | 14 | 31 |
|  | abnormal prepulse inhibition                                     | 272 | 1.58718e-4 | 4.25620e-3 | 2.1365  | 28 | 310 | 0.19% | 17 | 63 |
|  | increased fibroma incidence                                      | 273 | 1.61113e-4 | 4.30460e-3 | 4.4352  | 9  | 48  | 0.06% | 6  | 11 |
|  | abnormal vertebral transverse process morphology                 | 277 | 1.73448e-4 | 4.56727e-3 | 3.0950  | 14 | 107 | 0.09% | 5  | 7  |
|  | abnormal secondary ovarian follicle morphology                   | 281 | 1.90339e-4 | 4.94069e-3 | 2.9324  | 15 | 121 | 0.10% | 9  | 29 |
|  | thin cerebral cortex                                             | 291 | 2.31017e-4 | 5.79052e-3 | 2.2351  | 24 | 254 | 0.16% | 15 | 65 |
|  | absent patella                                                   | 295 | 2.54205e-4 | 6.28533e-3 | 3.1379  | 13 | 98  | 0.09% | 4  | 7  |
|  | abnormal liver development                                       | 296 | 2.54422e-4 | 6.26944e-3 | 2.0763  | 28 | 319 | 0.19% | 21 | 55 |
|  | abnormal rib development                                         | 300 | 2.59553e-4 | 6.31061e-3 | 2.2176  | 24 | 256 | 0.16% | 15 | 30 |
|  | distended pericardium                                            | 301 | 2.65088e-4 | 6.42376e-3 | 2.1741  | 25 | 272 | 0.17% | 20 | 59 |
|  | abnormal renal glomerulus basement membrane morphology           | 304 | 2.81463e-4 | 6.75325e-3 | 2.9568  | 14 | 112 | 0.09% | 8  | 13 |
|  | abnormal pancreatic acinar cell morphology                       | 305 | 2.86314e-4 | 6.84712e-3 | 2.4694  | 19 | 182 | 0.13% | 11 | 38 |
|  | abnormal ilium morphology                                        | 308 | 3.11046e-4 | 7.36613e-3 | 3.0751  | 13 | 100 | 0.09% | 4  | 9  |
|  | decreased aggression towards males                               | 313 | 3.30789e-4 | 7.70855e-3 | 4.5056  | 8  | 42  | 0.05% | 6  | 13 |
|  | dermal cysts                                                     | 314 | 3.34650e-4 | 7.77368e-3 | 3.2256  | 12 | 88  | 0.08% | 5  | 9  |
|  | enlarged prostate gland                                          | 317 | 3.51985e-4 | 8.09898e-3 | 4.0168  | 9  | 53  | 0.06% | 7  | 16 |
|  | decreased tongue size                                            | 322 | 3.78371e-4 | 8.57092e-3 | 3.0148  | 13 | 102 | 0.09% | 8  | 15 |
|  | pale liver                                                       | 323 | 3.79283e-4 | 8.56499e-3 | 2.0255  | 28 | 327 | 0.19% | 23 | 75 |
|  | increased melanoma incidence                                     | 325 | 3.91414e-4 | 8.78454e-3 | 4.4009  | 8  | 43  | 0.05% | 5  | 10 |
|  | diarrhea                                                         | 327 | 4.03110e-4 | 8.99170e-3 | 2.4034  | 19 | 187 | 0.13% | 13 | 41 |
|  | increased pancreatic islet number                                | 328 | 4.06640e-4 | 9.04277e-3 | 3.9424  | 9  | 54  | 0.06% | 3  | 9  |
|  | short maxilla                                                    | 329 | 4.07177e-4 | 9.02720e-3 | 2.1504  | 24 | 264 | 0.16% | 16 | 42 |
|  | abnormal pancreatic islet number                                 | 334 | 4.17761e-4 | 9.12320e-3 | 2.7294  | 15 | 130 | 0.10% | 7  | 21 |
|  | myoclonus                                                        | 338 | 4.30879e-4 | 9.29831e-3 | 2.3906  | 19 | 188 | 0.13% | 11 | 31 |
|  | retinal ganglion cell degeneration                               | 339 | 4.37649e-4 | 9.41655e-3 | 3.5840  | 10 | 66  | 0.07% | 6  | 15 |
|  | abnormal Rathke's pouch                                          | 343 | 4.55211e-4 | 9.68021e-3 | 2.4470  | 18 | 174 | 0.12% | 11 | 25 |
|  | abnormal bronchus epithelium morphology                          | 344 | 4.57531e-4 | 9.70126e-3 | 3.1193  | 12 | 91  | 0.08% | 8  | 16 |
|  | abnormal rhombomere morphology                                   | 346 | 4.58474e-4 | 9.66506e-3 | 2.3191  | 20 | 204 | 0.13% | 13 | 25 |
|  | increased spindle cell carcinoma incidence                       | 347 | 4.72865e-4 | 9.93970e-3 | 4.8701  | 7  | 34  | 0.05% | 4  | 6  |
|  | abnormal pulmonary respiratory rate                              | 349 | 4.79120e-4 | 1.00135e-2 | 2.2579  | 21 | 220 | 0.14% | 16 | 44 |
|  | abnormal CNS synapse formation                                   | 351 | 4.88236e-4 | 1.01458e-2 | 2.5923  | 16 | 146 | 0.11% | 8  | 26 |
|  | squamous cell carcinoma                                          | 359 | 5.39685e-4 | 1.09651e-2 | 2.2376  | 21 | 222 | 0.14% | 10 | 45 |
|  | abnormal neuromere morphology                                    | 369 | 5.87223e-4 | 1.16076e-2 | 2.2745  | 20 | 208 | 0.13% | 13 | 26 |
|  | increased retinal ganglion cell number                           | 372 | 6.13911e-4 | 1.20373e-2 | 3.7349  | 9  | 57  | 0.06% | 4  | 10 |
|  | increased mesothelioma incidence                                 | 379 | 6.81452e-4 | 1.31148e-2 | 4.5995  | 7  | 36  | 0.05% | 4  | 8  |
|  | increased cholangiocarcinoma incidence                           | 379 | 6.81452e-4 | 1.31148e-2 | 4.5995  | 7  | 36  | 0.05% | 5  | 6  |
|  | decreased salivation                                             | 384 | 7.06100e-4 | 1.34122e-2 | 3.3792  | 10 | 70  | 0.07% | 6  | 17 |
|  | abnormal orientation of cochlear hair cell stereociliary bundles | 392 | 7.64923e-4 | 1.42330e-2 | 2.2814  | 19 | 197 | 0.13% | 11 | 36 |
|  | decreased circulating estrogen level                             | 393 | 7.85416e-4 | 1.45772e-2 | 2.5712  | 15 | 138 | 0.10% | 9  | 28 |
|  | ventricular hypoplasia                                           | 397 | 8.15635e-4 | 1.49855e-2 | 2.4737  | 16 | 153 | 0.11% | 9  | 29 |
|  | decreased renal tubule number                                    | 399 | 8.25689e-4 | 1.50942e-2 | 3.0976  | 11 | 84  | 0.07% | 4  | 6  |
|  | small limb buds                                                  | 399 | 8.25689e-4 | 1.50942e-2 | 3.0976  | 11 | 84  | 0.07% | 7  | 12 |
|  | abnormal macrophage activation involved in immune response       | 403 | 8.44429e-4 | 1.52835e-2 | 3.9424  | 8  | 48  | 0.05% | 4  | 7  |
|  | abnormal extraembryonic endoderm formation                       | 406 | 8.80208e-4 | 1.58134e-2 | 2.3140  | 18 | 184 | 0.12% | 10 | 35 |
|  | abnormal pancreatic acinus morphology                            | 408 | 8.88418e-4 | 1.58826e-2 | 2.2004  | 20 | 215 | 0.13% | 12 | 44 |
|  | abnormal pulmonary alveolar duct morphology                      | 409 | 9.00428e-4 | 1.60580e-2 | 3.5482  | 9  | 60  | 0.06% | 4  | 14 |
|  | absent amacrine cells                                            | 415 | 9.60969e-4 | 1.68899e-2 | 5.0688  | 6  | 28  | 0.04% | 1  | 4  |
|  | abnormal susceptibility to hearing loss                          | 420 | 9.97143e-4 | 1.73170e-2 | 2.2892  | 18 | 186 | 0.12% | 13 | 34 |

|  |                                                                  |     |            |            |         |    |     |       |    |    |
|--|------------------------------------------------------------------|-----|------------|------------|---------|----|-----|-------|----|----|
|  | abnormal prostate gland size                                     | 422 | 1.00472e-3 | 1.73660e-2 | 2.4261  | 16 | 156 | 0.11% | 13 | 37 |
|  | abnormal heart shape                                             | 426 | 1.05430e-3 | 1.80518e-2 | 2.4987  | 15 | 142 | 0.10% | 12 | 29 |
|  | abnormal pancreas development                                    | 429 | 1.06177e-3 | 1.80525e-2 | 2.1228  | 21 | 234 | 0.14% | 12 | 32 |
|  | increased hepatocyte apoptosis                                   | 432 | 1.08158e-3 | 1.82617e-2 | 2.0060  | 24 | 283 | 0.16% | 18 | 56 |
|  | pancreatic intraepithelial neoplasia                             | 437 | 1.14561e-3 | 1.91214e-2 | 3.4337  | 9  | 62  | 0.06% | 6  | 11 |
|  | abnormal primary somatosensory cortex morphology                 | 438 | 1.17316e-3 | 1.95366e-2 | 2.8104  | 12 | 101 | 0.08% | 9  | 18 |
|  | increased vertebrae number                                       | 439 | 1.17358e-3 | 1.94990e-2 | 2.5672  | 14 | 129 | 0.09% | 3  | 13 |
|  | abnormal conotruncus morphology                                  | 441 | 1.18148e-3 | 1.95414e-2 | 2.1049  | 21 | 236 | 0.14% | 11 | 33 |
|  | failure of palatal shelf elevation                               | 443 | 1.19726e-3 | 1.97128e-2 | 2.2528  | 18 | 189 | 0.12% | 10 | 29 |
|  | cleft chin                                                       | 447 | 1.20199e-3 | 1.96136e-2 | 7.8849  | 4  | 12  | 0.03% | 2  | 3  |
|  | abnormal circulating potassium level                             | 448 | 1.21550e-3 | 1.97898e-2 | 2.4640  | 15 | 144 | 0.10% | 9  | 29 |
|  | increased aggression                                             | 449 | 1.22190e-3 | 1.98498e-2 | 2.3111  | 17 | 174 | 0.11% | 15 | 36 |
|  | abnormal alveolocapillary membrane morphology                    | 450 | 1.22691e-3 | 1.98869e-2 | 5.9137  | 5  | 20  | 0.03% | 2  | 3  |
|  | abnormal serous gland morphology                                 | 450 | 1.22691e-3 | 1.98869e-2 | 5.9137  | 5  | 20  | 0.03% | 3  | 3  |
|  | mammary gland hyperplasia                                        | 454 | 1.27913e-3 | 2.05506e-2 | 2.7829  | 12 | 102 | 0.08% | 8  | 18 |
|  | arteritis                                                        | 455 | 1.31314e-3 | 2.10507e-2 | 4.1396  | 7  | 40  | 0.05% | 5  | 13 |
|  | enlarged lung                                                    | 460 | 1.37642e-3 | 2.18253e-2 | 2.1712  | 19 | 207 | 0.13% | 11 | 48 |
|  | short sternum                                                    | 461 | 1.38266e-3 | 2.18766e-2 | 2.0784  | 21 | 239 | 0.14% | 13 | 39 |
|  | increased grooming behavior                                      | 463 | 1.39289e-3 | 2.19434e-2 | 2.7559  | 12 | 103 | 0.08% | 7  | 16 |
|  | increased glioblastoma incidence                                 | 464 | 1.40884e-3 | 2.21467e-2 | 4.7309  | 6  | 30  | 0.04% | 4  | 7  |
|  | patent ductus arteriosus                                         | 466 | 1.44206e-3 | 2.25716e-2 | 3.3264  | 9  | 64  | 0.06% | 6  | 16 |
|  | abnormal cortical ventricular zone morphology                    | 466 | 1.44206e-3 | 2.25716e-2 | 3.3264  | 9  | 64  | 0.06% | 5  | 10 |
|  | absent ulna                                                      | 471 | 1.49474e-3 | 2.31479e-2 | 3.0720  | 10 | 77  | 0.07% | 3  | 8  |
|  | abnormal cricoid cartilage morphology                            | 472 | 1.49573e-3 | 2.31140e-2 | 2.3363  | 16 | 162 | 0.11% | 9  | 17 |
|  | increased keratinocyte proliferation                             | 472 | 1.49573e-3 | 2.31140e-2 | 2.3363  | 16 | 162 | 0.11% | 9  | 31 |
|  | enlarged hair follicles                                          | 479 | 1.55454e-3 | 2.36718e-2 | 5.6320  | 5  | 21  | 0.03% | 2  | 4  |
|  | progressive muscle weakness                                      | 485 | 1.60744e-3 | 2.41746e-2 | 2.8593  | 11 | 91  | 0.07% | 9  | 29 |
|  | vasculitis                                                       | 485 | 1.60744e-3 | 2.41746e-2 | 2.8593  | 11 | 91  | 0.07% | 10 | 25 |
|  | muscular ventricular septal defect                               | 488 | 1.62902e-3 | 2.43485e-2 | 2.5841  | 13 | 119 | 0.09% | 7  | 18 |
|  | kidney medulla hypoplasia                                        | 490 | 1.64552e-3 | 2.44948e-2 | 2.7034  | 12 | 105 | 0.08% | 5  | 8  |
|  | abnormal hippocampal fimbria                                     | 491 | 1.65047e-3 | 2.45184e-2 | 3.0326  | 10 | 78  | 0.07% | 6  | 10 |
|  | impaired branching involved in terminal bronchiole morphogenesis | 491 | 1.65047e-3 | 2.45184e-2 | 3.0326  | 10 | 78  | 0.07% | 5  | 11 |
|  | small ischium                                                    | 497 | 1.67820e-3 | 2.46294e-2 | 7.2783  | 4  | 13  | 0.03% | 1  | 2  |
|  | absent awl hair                                                  | 497 | 1.67820e-3 | 2.46294e-2 | 7.2783  | 4  | 13  | 0.03% | 1  | 1  |
|  | delayed male fertility                                           | 497 | 1.67820e-3 | 2.46294e-2 | 7.2783  | 4  | 13  | 0.03% | 3  | 6  |
|  | absent auchene hairs                                             | 500 | 1.68497e-3 | 2.45803e-2 | 4.5783  | 6  | 31  | 0.04% | 2  | 5  |
|  | L5 dorsal root ganglion hypertrophy                              | 504 | 1.78707e-3 | 2.58628e-2 | 23.6546 | 2  | 2   | 0.01% | 1  | 1  |
|  | enlarged prostate gland anterior lobe                            | 504 | 1.78707e-3 | 2.58628e-2 | 23.6546 | 2  | 2   | 0.01% | 2  | 2  |
|  | abnormal autophagy                                               | 512 | 1.91772e-3 | 2.73200e-2 | 2.7979  | 11 | 93  | 0.07% | 6  | 22 |
|  | increased susceptibility to noise-induced hearing loss           | 515 | 1.99925e-3 | 2.83155e-2 | 3.1775  | 9  | 67  | 0.06% | 6  | 13 |
|  | uterus adenomyosis                                               | 517 | 2.03250e-3 | 2.86752e-2 | 3.8507  | 7  | 43  | 0.05% | 4  | 6  |
|  | increased neurofibroma incidence                                 | 517 | 2.03250e-3 | 2.86752e-2 | 3.8507  | 7  | 43  | 0.05% | 5  | 8  |
|  | increased pulmonary respiratory rate                             | 519 | 2.03907e-3 | 2.86570e-2 | 2.5206  | 13 | 122 | 0.09% | 10 | 25 |
|  | abnormal intestinal goblet cells                                 | 520 | 2.06734e-3 | 2.89984e-2 | 2.0111  | 21 | 247 | 0.14% | 12 | 43 |
|  | abnormal sternum ossification                                    | 520 | 2.06734e-3 | 2.89984e-2 | 2.0111  | 21 | 247 | 0.14% | 13 | 39 |
|  | abnormal oviduct morphology                                      | 523 | 2.09018e-3 | 2.91507e-2 | 2.7681  | 11 | 94  | 0.07% | 8  | 18 |
|  | increased prostate gland tumor incidence                         | 523 | 2.09018e-3 | 2.91507e-2 | 2.7681  | 11 | 94  | 0.07% | 6  | 26 |
|  | absent ureter                                                    | 530 | 2.19329e-3 | 3.01846e-2 | 2.5001  | 13 | 123 | 0.09% | 7  | 18 |
|  | abnormal orientation of outer hair cell stereociliary bundles    | 530 | 2.19329e-3 | 3.01846e-2 | 2.5001  | 13 | 123 | 0.09% | 8  | 24 |
|  | reduced linear vestibular evoked potential                       | 532 | 2.19798e-3 | 3.01355e-2 | 2.9203  | 10 | 81  | 0.07% | 5  | 13 |
|  | pancreas cysts                                                   | 537 | 2.27502e-3 | 3.09014e-2 | 2.7390  | 11 | 95  | 0.07% | 7  | 22 |
|  | increased cochlear nerve compound action potential               | 540 | 2.32522e-3 | 3.14077e-2 | 10.1377 | 3  | 7   | 0.02% | 2  | 2  |
|  | abnormal memory B cell morphology                                | 541 | 2.32986e-3 | 3.14121e-2 | 3.7632  | 7  | 44  | 0.05% | 5  | 14 |
|  | small pubis                                                      | 541 | 2.32986e-3 | 3.14121e-2 | 3.7632  | 7  | 44  | 0.05% | 4  | 7  |
|  | social withdrawal                                                | 543 | 2.35793e-3 | 3.16736e-2 | 3.3792  | 8  | 56  | 0.05% | 7  | 8  |
|  | abnormal visual cortex morphology                                | 544 | 2.35819e-3 | 3.16189e-2 | 4.3008  | 6  | 33  | 0.04% | 3  | 7  |
|  | absent retinal inner plexiform layer                             | 544 | 2.35819e-3 | 3.16189e-2 | 4.3008  | 6  | 33  | 0.04% | 1  | 4  |
|  | skeletal muscle fibrosis                                         | 547 | 2.38561e-3 | 3.18110e-2 | 2.3825  | 14 | 139 | 0.09% | 10 | 26 |
|  | abnormal auditory cortex morphology                              | 548 | 2.39588e-3 | 3.18897e-2 | 5.1423  | 5  | 23  | 0.03% | 2  | 4  |
|  | absent ilium                                                     | 548 | 2.39588e-3 | 3.18897e-2 | 5.1423  | 5  | 23  | 0.03% | 2  | 2  |
|  | abnormal extraocular muscle morphology                           | 548 | 2.39588e-3 | 3.18897e-2 | 5.1423  | 5  | 23  | 0.03% | 4  | 5  |
|  | necrospemia                                                      | 548 | 2.39588e-3 | 3.18897e-2 | 5.1423  | 5  | 23  | 0.03% | 2  | 5  |
|  | hyperpigmentation                                                | 552 | 2.44524e-3 | 3.23109e-2 | 2.5805  | 12 | 110 | 0.08% | 8  | 27 |
|  | decreased synaptic depression                                    | 555 | 2.45752e-3 | 3.22976e-2 | 3.0854  | 9  | 69  | 0.06% | 5  | 10 |
|  | abnormal second branchial arch morphology                        | 561 | 2.63810e-3 | 3.43001e-2 | 2.1504  | 17 | 187 | 0.11% | 13 | 37 |
|  | prostate gland adenocarcinoma                                    | 563 | 2.64267e-3 | 3.42374e-2 | 3.3199  | 8  | 57  | 0.05% | 5  | 15 |

|                  |                                                                  |     |            |            |         |    |     |       |    |    |
|------------------|------------------------------------------------------------------|-----|------------|------------|---------|----|-----|-------|----|----|
|                  | abnormal pancreatic beta cell differentiation                    | 565 | 2.65961e-3 | 3.43349e-2 | 3.6796  | 7  | 45  | 0.05% | 2  | 7  |
|                  | abnormal nest building behavior                                  | 567 | 2.68441e-3 | 3.45328e-2 | 2.6825  | 11 | 97  | 0.07% | 8  | 18 |
|                  | abnormal anterior visceral endoderm morphology                   | 567 | 2.68441e-3 | 3.45328e-2 | 2.6825  | 11 | 97  | 0.07% | 5  | 19 |
|                  | abnormal accessory nerve morphology                              | 571 | 2.76219e-3 | 3.52845e-2 | 4.1743  | 6  | 34  | 0.04% | 3  | 4  |
|                  | bronchiolar epithelial hyperplasia                               | 571 | 2.76219e-3 | 3.52845e-2 | 4.1743  | 6  | 34  | 0.04% | 4  | 5  |
|                  | abnormal vestibulocochlear nerve morphology                      | 574 | 2.84288e-3 | 3.61254e-2 | 2.5344  | 12 | 112 | 0.08% | 8  | 19 |
|                  | small vestibular ganglion                                        | 577 | 2.88273e-3 | 3.64413e-2 | 2.8160  | 10 | 84  | 0.07% | 6  | 14 |
|                  | abnormal pancreatic alpha cell morphology                        | 578 | 2.89454e-3 | 3.65272e-2 | 2.0337  | 19 | 221 | 0.13% | 12 | 35 |
|                  | abnormal barrel cortex morphology                                | 579 | 2.91029e-3 | 3.66627e-2 | 2.6551  | 11 | 98  | 0.07% | 8  | 17 |
|                  | proctitis                                                        | 580 | 2.92191e-3 | 3.67456e-2 | 4.9280  | 5  | 24  | 0.03% | 3  | 3  |
|                  | increased grip strength                                          | 580 | 2.92191e-3 | 3.67456e-2 | 4.9280  | 5  | 24  | 0.03% | 3  | 6  |
|                  | increased stomach tumor incidence                                | 589 | 3.15121e-3 | 3.90237e-2 | 2.6283  | 11 | 99  | 0.07% | 8  | 22 |
|                  | decreased circulating follicle stimulating hormone level         | 593 | 3.21411e-3 | 3.95340e-2 | 2.2316  | 15 | 159 | 0.10% | 9  | 30 |
|                  | abnormal amacrine cell morphology                                | 595 | 3.27208e-3 | 4.01119e-2 | 2.1627  | 16 | 175 | 0.11% | 9  | 35 |
|                  | decreased follicle stimulating hormone level                     | 596 | 3.28220e-3 | 4.01684e-2 | 2.1054  | 17 | 191 | 0.11% | 11 | 38 |
|                  | abnormal cochlear nerve morphology                               | 598 | 3.29217e-3 | 4.01557e-2 | 3.2074  | 8  | 59  | 0.05% | 5  | 12 |
|                  | tachypnea                                                        | 599 | 3.29694e-3 | 4.01467e-2 | 2.9568  | 9  | 72  | 0.06% | 7  | 14 |
|                  | abnormal penis morphology                                        | 600 | 3.29974e-3 | 4.01138e-2 | 2.2998  | 14 | 144 | 0.09% | 9  | 25 |
|                  | pale placenta                                                    | 604 | 3.40788e-3 | 4.11541e-2 | 2.6020  | 11 | 100 | 0.07% | 8  | 11 |
|                  | fusion of glossopharyngeal and vagus nerve                       | 604 | 3.40788e-3 | 4.11541e-2 | 2.6020  | 11 | 100 | 0.07% | 6  | 12 |
|                  | abnormal parietal lobe morphology                                | 608 | 3.46087e-3 | 4.15191e-2 | 2.1504  | 16 | 176 | 0.11% | 13 | 33 |
|                  | decreased circulating sodium level                               | 611 | 3.52648e-3 | 4.20984e-2 | 4.7309  | 5  | 25  | 0.03% | 3  | 9  |
|                  | abnormal interventricular septum muscular part morphology        | 613 | 3.56216e-3 | 4.23856e-2 | 2.3655  | 13 | 130 | 0.09% | 7  | 20 |
|                  | decreased circulating antidiuretic hormone level                 | 616 | 3.60345e-3 | 4.26682e-2 | 8.8705  | 3  | 8   | 0.02% | 2  | 2  |
|                  | impaired synaptic plasticity                                     | 618 | 3.65002e-3 | 4.30797e-2 | 2.0836  | 17 | 193 | 0.11% | 12 | 31 |
|                  | abnormal sesamoid bone of gastrocnemius morphology               | 619 | 3.66013e-3 | 4.31292e-2 | 3.1539  | 8  | 60  | 0.05% | 2  | 3  |
|                  | abnormal endplate potential                                      | 624 | 3.79536e-3 | 4.43644e-2 | 2.4470  | 12 | 116 | 0.08% | 8  | 15 |
|                  | absent ureteric bud                                              | 625 | 3.80456e-3 | 4.44007e-2 | 2.3474  | 13 | 131 | 0.09% | 6  | 12 |
|                  | abnormal vagina opening                                          | 627 | 3.84630e-3 | 4.47446e-2 | 2.0728  | 17 | 194 | 0.11% | 12 | 39 |
|                  | failure of atrioventricular cushion closure                      | 629 | 3.86602e-3 | 4.48311e-2 | 3.4496  | 7  | 48  | 0.05% | 4  | 9  |
|                  | constricted vagina opening                                       | 629 | 3.86602e-3 | 4.48311e-2 | 3.4496  | 7  | 48  | 0.05% | 3  | 6  |
|                  | vascular inflammation                                            | 634 | 3.97135e-3 | 4.56893e-2 | 2.5510  | 11 | 102 | 0.07% | 10 | 30 |
|                  | darkened coat color                                              | 634 | 3.97135e-3 | 4.56893e-2 | 2.5510  | 11 | 102 | 0.07% | 6  | 18 |
|                  | decreased pulmonary ventilation                                  | 639 | 4.04930e-3 | 4.62216e-2 | 2.6880  | 10 | 88  | 0.07% | 6  | 13 |
|                  | abnormal branching involved in terminal bronchiole morphogenesis | 639 | 4.04930e-3 | 4.62216e-2 | 2.6880  | 10 | 88  | 0.07% | 5  | 13 |
|                  | abnormal vascular regression                                     | 643 | 4.08169e-3 | 4.63015e-2 | 2.1144  | 16 | 179 | 0.11% | 12 | 39 |
|                  | abnormal fetal ductus arteriosus morphology                      | 649 | 4.22140e-3 | 4.74436e-2 | 2.2376  | 14 | 148 | 0.09% | 10 | 25 |
|                  | abnormal ureter development                                      | 652 | 4.26493e-3 | 4.77123e-2 | 2.0517  | 17 | 196 | 0.11% | 9  | 23 |
|                  | abnormal occipital lobe morphology                               | 653 | 4.28646e-3 | 4.78797e-2 | 3.8359  | 6  | 37  | 0.04% | 3  | 9  |
|                  | absent branchial arches                                          | 656 | 4.34676e-3 | 4.83312e-2 | 2.8386  | 9  | 75  | 0.06% | 8  | 9  |
|                  | increased fibrosarcoma incidence                                 | 656 | 4.34676e-3 | 4.83312e-2 | 2.8386  | 9  | 75  | 0.06% | 6  | 18 |
|                  | abnormal hair follicle outer root sheath morphology              | 660 | 4.39232e-3 | 4.85418e-2 | 2.6578  | 10 | 89  | 0.07% | 8  | 16 |
|                  | hyperresponsive to tactile stimuli                               | 664 | 4.49071e-3 | 4.93302e-2 | 3.0522  | 8  | 62  | 0.05% | 5  | 10 |
|                  | abnormal conotruncus septation                                   | 664 | 4.49071e-3 | 4.93302e-2 | 3.0522  | 8  | 62  | 0.05% | 4  | 6  |
|                  |                                                                  |     |            |            |         |    |     |       |    |    |
| Disease Ontology | Conn syndrome                                                    | 44  | 5.07396e-6 | 2.57619e-4 | 9.1990  | 7  | 18  | 0.05% | 5  | 8  |
|                  | middle ear disease                                               | 56  | 9.52958e-6 | 3.80162e-4 | 2.7294  | 24 | 208 | 0.16% | 17 | 51 |
|                  | primary Escherichia coli infectious disease                      | 68  | 1.94168e-5 | 6.37899e-4 | 3.7632  | 14 | 88  | 0.09% | 3  | 9  |
|                  | commensal Escherichia coli infectious disease                    | 68  | 1.94168e-5 | 6.37899e-4 | 3.7632  | 14 | 88  | 0.09% | 3  | 9  |
|                  | primary Enterobacteriaceae infectious disease                    | 79  | 4.52652e-5 | 1.28003e-3 | 3.0464  | 17 | 132 | 0.11% | 5  | 16 |
|                  | myopia                                                           | 83  | 5.33988e-5 | 1.43726e-3 | 2.7189  | 20 | 174 | 0.13% | 14 | 40 |
|                  | otitis media                                                     | 89  | 8.40485e-5 | 2.10971e-3 | 3.4944  | 13 | 88  | 0.09% | 7  | 23 |
|                  | refractive error                                                 | 94  | 1.88447e-4 | 4.47864e-3 | 2.2232  | 25 | 266 | 0.17% | 19 | 54 |
|                  | Hashimoto Disease                                                | 110 | 5.67576e-4 | 1.15270e-2 | 2.5573  | 16 | 148 | 0.11% | 11 | 41 |
|                  | cervical adenocarcinoma                                          | 127 | 9.12613e-4 | 1.60534e-2 | 3.0612  | 11 | 85  | 0.07% | 7  | 19 |
|                  | glandular cystitis                                               | 134 | 1.11481e-3 | 1.85857e-2 | 3.7847  | 8  | 50  | 0.05% | 3  | 6  |
|                  | mucinous adenocarcinoma                                          | 135 | 1.14561e-3 | 1.89577e-2 | 3.4337  | 9  | 62  | 0.06% | 3  | 9  |
|                  | Hirschsprung's disease                                           | 137 | 1.39556e-3 | 2.27567e-2 | 2.6283  | 13 | 117 | 0.09% | 9  | 17 |
|                  | actinic keratosis                                                | 139 | 1.44206e-3 | 2.31766e-2 | 3.3264  | 9  | 64  | 0.06% | 6  | 19 |
|                  | Burkitt's lymphoma                                               | 140 | 1.56432e-3 | 2.49621e-2 | 2.2591  | 17 | 178 | 0.11% | 14 | 39 |
|                  | endemic goiter                                                   | 145 | 1.78707e-3 | 2.75332e-2 | 23.6546 | 2  | 2   | 0.01% | 1  | 1  |
|                  | background diabetic retinopathy                                  | 145 | 1.78707e-3 | 2.75332e-2 | 23.6546 | 2  | 2   | 0.01% | 1  | 1  |
|                  | chronic cystitis                                                 | 147 | 1.81908e-3 | 2.76450e-2 | 2.9943  | 10 | 79  | 0.07% | 5  | 15 |
|                  | Charcot-Marie-Tooth disease                                      | 149 | 1.87129e-3 | 2.80567e-2 | 2.2217  | 17 | 181 | 0.11% | 9  | 31 |
|                  | megacolon                                                        | 150 | 1.89389e-3 | 2.82064e-2 | 2.5414  | 13 | 121 | 0.09% | 9  | 19 |

|                            |                                                                                    |     |            |            |         |    |     |       |    |     |
|----------------------------|------------------------------------------------------------------------------------|-----|------------|------------|---------|----|-----|-------|----|-----|
| MSigDB Cancer Neighborhood | Neighborhood of CASP10                                                             | 2   | 4.07057e-6 | 8.69066e-4 | 2.1026  | 44 | 495 | 0.29% | 34 | 109 |
|                            | Neighborhood of SMO                                                                | 15  | 1.00583e-3 | 2.86326e-2 | 2.0900  | 22 | 249 | 0.15% | 16 | 51  |
|                            | Neighborhood of DDX11                                                              | 16  | 1.12707e-3 | 3.00787e-2 | 2.2648  | 18 | 188 | 0.12% | 13 | 38  |
|                            | Neighborhood of AQP4                                                               | 17  | 1.22872e-3 | 3.08626e-2 | 2.1924  | 19 | 205 | 0.13% | 14 | 43  |
|                            | Neighborhood of RTN1                                                               | 18  | 1.66154e-3 | 3.94155e-2 | 2.2465  | 17 | 179 | 0.11% | 11 | 44  |
|                            | Neighborhood of JUND                                                               | 20  | 1.98422e-3 | 4.23630e-2 | 2.2095  | 17 | 182 | 0.11% | 15 | 67  |
| PANTHER Pathway            | TGF-beta signaling pathway                                                         | 1   | 3.26658e-6 | 4.57321e-4 | 2.0458  | 48 | 555 | 0.32% | 32 | 95  |
|                            | General transcription regulation                                                   | 2   | 8.75483e-5 | 6.12838e-3 | 3.1400  | 15 | 113 | 0.10% | 12 | 35  |
|                            | Ras Pathway                                                                        | 3   | 1.38449e-4 | 6.46098e-3 | 2.0119  | 33 | 388 | 0.22% | 22 | 70  |
|                            | Beta2 adrenergic receptor signaling pathway                                        | 14  | 2.56960e-3 | 2.56959e-2 | 2.0132  | 20 | 235 | 0.13% | 15 | 43  |
|                            | Gamma-aminobutyric acid synthesis                                                  | 17  | 3.52648e-3 | 2.90416e-2 | 4.7309  | 5  | 25  | 0.03% | 3  | 5   |
|                            | Transcription regulation by bZIP transcription factor                              | 19  | 4.72024e-3 | 3.47807e-2 | 2.0310  | 17 | 198 | 0.11% | 14 | 51  |
| Pathway Commons            | NCAM signaling for neurite out-growth                                              | 3   | 1.05641e-5 | 5.65883e-3 | 2.2316  | 35 | 371 | 0.23% | 23 | 57  |
|                            | Cell junction organization                                                         | 22  | 8.81267e-5 | 6.43726e-3 | 2.0361  | 34 | 395 | 0.23% | 23 | 70  |
|                            | N-Glycan antennae elongation                                                       | 50  | 1.35988e-4 | 4.37065e-3 | 4.5296  | 9  | 47  | 0.06% | 4  | 9   |
|                            | Signaling by Interleukins                                                          | 58  | 3.38000e-4 | 9.36494e-3 | 2.0117  | 29 | 341 | 0.19% | 26 | 93  |
|                            | Tight junction interactions                                                        | 61  | 5.43390e-4 | 1.43152e-2 | 3.2525  | 11 | 80  | 0.07% | 6  | 19  |
|                            | NCAM1 interactions                                                                 | 63  | 5.96006e-4 | 1.52029e-2 | 2.3287  | 19 | 193 | 0.13% | 10 | 23  |
|                            | Stimulation of the cell death response by PAK-2p34                                 | 68  | 7.27653e-4 | 1.71962e-2 | 6.5707  | 5  | 18  | 0.03% | 3  | 3   |
|                            | Cell-cell junction organization                                                    | 70  | 9.52608e-4 | 2.18692e-2 | 2.1411  | 21 | 232 | 0.14% | 15 | 46  |
|                            | Voltage gated Potassium channels                                                   | 72  | 1.00583e-3 | 2.24496e-2 | 2.0900  | 22 | 249 | 0.15% | 14 | 40  |
|                            | Transport to the Golgi and subsequent modification                                 | 73  | 1.01129e-3 | 2.22622e-2 | 2.7213  | 13 | 113 | 0.09% | 7  | 28  |
|                            | N-glycan antennae elongation in the medial/trans-Golgi                             | 74  | 1.01705e-3 | 2.20865e-2 | 3.4900  | 9  | 61  | 0.06% | 4  | 12  |
|                            | CDO in myogenesis                                                                  | 75  | 1.12707e-3 | 2.41493e-2 | 2.2648  | 18 | 188 | 0.12% | 12 | 24  |
|                            | Myogenesis                                                                         | 75  | 1.12707e-3 | 2.41493e-2 | 2.2648  | 18 | 188 | 0.12% | 12 | 24  |
|                            | Transcription of the HIV genome                                                    | 77  | 1.22872e-3 | 2.56435e-2 | 2.1924  | 19 | 205 | 0.13% | 14 | 61  |
|                            | Ras signaling in the CD4+ TCR pathway                                              | 78  | 1.30079e-3 | 2.67996e-2 | 2.1817  | 19 | 206 | 0.13% | 14 | 42  |
|                            | Regulation of PAK-2p34 activity by PS-GAP/RHG10                                    | 79  | 1.37190e-3 | 2.79069e-2 | 11.8273 | 3  | 6   | 0.02% | 1  | 2   |
|                            | p38MAPK events                                                                     | 81  | 1.64552e-3 | 3.26464e-2 | 2.7034  | 12 | 105 | 0.08% | 7  | 9   |
|                            | CD28 dependent Vav1 pathway                                                        | 82  | 1.75701e-3 | 3.44330e-2 | 2.8283  | 11 | 92  | 0.07% | 7  | 18  |
|                            | Hormone ligand-binding receptors                                                   | 84  | 2.00028e-3 | 3.82673e-2 | 4.4352  | 6  | 32  | 0.04% | 3  | 10  |
|                            | Signalling to RAS                                                                  | 85  | 2.04608e-3 | 3.86830e-2 | 2.2663  | 16 | 167 | 0.11% | 11 | 21  |
| MSigDB Pathway             | Arrhythmogenic right ventricular cardiomyopathy (ARVC)                             | 1   | 1.21032e-6 | 1.06508e-3 | 2.3022  | 40 | 411 | 0.27% | 32 | 74  |
|                            | Renal cell carcinoma                                                               | 2   | 4.88970e-6 | 2.15147e-3 | 2.3448  | 34 | 343 | 0.23% | 25 | 70  |
|                            | Genes related to PIP3 signaling in B lymphocytes                                   | 5   | 5.42234e-5 | 9.54331e-3 | 3.1279  | 16 | 121 | 0.11% | 13 | 34  |
|                            | Agrin in Postsynaptic Differentiation                                              | 7   | 1.09022e-4 | 1.37056e-2 | 2.6594  | 19 | 169 | 0.13% | 12 | 36  |
|                            | Genes involved in MyoGenesis                                                       | 11  | 2.39821e-4 | 1.91857e-2 | 2.3232  | 22 | 224 | 0.15% | 15 | 29  |
|                            | Fc Epsilon Receptor I Signaling in Mast Cells                                      | 12  | 2.72454e-4 | 1.99800e-2 | 2.4137  | 20 | 196 | 0.13% | 14 | 38  |
|                            | Angiotensin II mediated activation of JNK Pathway via Pyk2 dependent signaling     | 15  | 4.91425e-4 | 2.88303e-2 | 2.3655  | 19 | 190 | 0.13% | 13 | 33  |
|                            | Genes involved in Signaling by EGFR                                                | 18  | 5.22447e-4 | 2.55418e-2 | 2.1958  | 22 | 237 | 0.15% | 17 | 49  |
|                            | Genes involved in Signalling to RAS                                                | 23  | 8.06999e-4 | 3.08765e-2 | 2.1692  | 21 | 229 | 0.14% | 13 | 26  |
|                            | Links between Pyk2 and Map Kinases                                                 | 25  | 9.45191e-4 | 3.32707e-2 | 2.3655  | 17 | 170 | 0.11% | 12 | 28  |
|                            | Genes related to chemotaxis                                                        | 25  | 9.45191e-4 | 3.32707e-2 | 2.3655  | 17 | 170 | 0.11% | 14 | 45  |
|                            | FAS signaling pathway ( CD95 )                                                     | 28  | 1.27913e-3 | 4.02013e-2 | 2.7829  | 12 | 102 | 0.08% | 8  | 30  |
|                            | Genes involved in Signalling to ERKs                                               | 30  | 1.66461e-3 | 4.88285e-2 | 2.0093  | 22 | 259 | 0.15% | 14 | 34  |
|                            | p38 MAPK Signaling Pathway                                                         | 31  | 1.70112e-3 | 4.82899e-2 | 2.1835  | 18 | 195 | 0.12% | 14 | 41  |
|                            | Genes involved in Activation of Rac                                                | 32  | 1.79720e-3 | 4.94229e-2 | 3.2256  | 9  | 66  | 0.06% | 6  | 14  |
|                            | JNK MAPK Pathway                                                                   | 33  | 1.87129e-3 | 4.99010e-2 | 2.2217  | 17 | 181 | 0.11% | 13 | 38  |
| MGI Expression: Detected   | TS9_extraembryonic component                                                       | 254 | 3.23539e-8 | 1.06335e-6 | 2.0761  | 66 | 752 | 0.44% | 44 | 133 |
|                            | TS23_lens                                                                          | 260 | 3.98160e-8 | 1.27840e-6 | 2.2151  | 56 | 598 | 0.37% | 33 | 122 |
|                            | TS28_cerebral cortex layer; layer VI                                               | 306 | 2.68037e-7 | 7.31234e-6 | 2.5442  | 37 | 344 | 0.25% | 20 | 54  |
|                            | TS28_tectum                                                                        | 314 | 3.62226e-7 | 9.63012e-6 | 2.2794  | 45 | 467 | 0.30% | 25 | 68  |
|                            | TS28_cerebral cortex layer; layer III                                              | 321 | 4.59460e-7 | 1.19488e-5 | 2.1746  | 49 | 533 | 0.33% | 30 | 97  |
|                            | TS28_cerebral cortex layer; layer II                                               | 339 | 1.27556e-6 | 3.14111e-5 | 2.1768  | 45 | 489 | 0.30% | 27 | 80  |
|                            | TS17_tail; nervous system; central nervous system; future spinal cord; neural tube | 346 | 1.63082e-6 | 3.93470e-5 | 3.0197  | 24 | 188 | 0.16% | 10 | 19  |
|                            | TS17_optic cup                                                                     | 357 | 2.31149e-6 | 5.40514e-5 | 2.0066  | 52 | 613 | 0.35% | 35 | 90  |
|                            | TS28_cerebral cortex layer; layer V                                                | 369 | 3.10165e-6 | 7.01696e-5 | 2.2159  | 40 | 427 | 0.27% | 23 | 78  |
|                            | TS28_cerebral cortex layer; layer IV                                               | 378 | 3.68109e-6 | 8.12956e-5 | 2.4497  | 32 | 309 | 0.21% | 20 | 56  |
|                            | TS21_arm                                                                           | 392 | 5.29916e-6 | 1.12850e-4 | 2.8244  | 24 | 201 | 0.16% | 12 | 26  |
|                            | TS17_tail; nervous system; central nervous system                                  | 397 | 5.77378e-6 | 1.21409e-4 | 2.8104  | 24 | 202 | 0.16% | 10 | 25  |

|                                  |                                                                                                                                                                                                             |     |             |             |        |    |     |       |    |     |
|----------------------------------|-------------------------------------------------------------------------------------------------------------------------------------------------------------------------------------------------------------|-----|-------------|-------------|--------|----|-----|-------|----|-----|
|                                  | TS17_tail; nervous system; central nervous system; future spinal cord                                                                                                                                       | 397 | 5.77378e-6  | 1.21409e-4  | 2.8104 | 24 | 202 | 0.16% | 10 | 24  |
|                                  | TS17_tail; nervous system                                                                                                                                                                                   | 400 | 6.28676e-6  | 1.31205e-4  | 2.7966 | 24 | 203 | 0.16% | 10 | 26  |
|                                  | TS25_cerebral cortex; intermediate zone                                                                                                                                                                     | 406 | 7.29506e-6  | 1.49998e-4  | 3.8567 | 15 | 92  | 0.10% | 7  | 15  |
|                                  | TS20_pons                                                                                                                                                                                                   | 409 | 7.59796e-6  | 1.55080e-4  | 2.7003 | 25 | 219 | 0.17% | 17 | 34  |
|                                  | TS21_neural retinal epithelium                                                                                                                                                                              | 414 | 8.65362e-6  | 1.74494e-4  | 2.2234 | 36 | 383 | 0.24% | 24 | 52  |
|                                  | TS15_tail; mesenchyme                                                                                                                                                                                       | 415 | 9.19265e-6  | 1.84916e-4  | 2.0002 | 46 | 544 | 0.31% | 29 | 87  |
|                                  | TS18_pancreas primordium                                                                                                                                                                                    | 421 | 1.14689e-5  | 2.27417e-4  | 8.2791 | 7  | 20  | 0.05% | 2  | 4   |
|                                  | TS17_atrio-ventricular canal                                                                                                                                                                                | 429 | 1.27079e-5  | 2.47285e-4  | 4.1555 | 13 | 74  | 0.09% | 7  | 12  |
|                                  |                                                                                                                                                                                                             |     |             |             |        |    |     |       |    |     |
| MSigDB Perturbation              | Genes down-regulated and displaying decreased copy number in glioblastoma samples.                                                                                                                          | 9   | 1.45423e-7  | 3.83594e-5  | 4.8522 | 16 | 78  | 0.11% | 10 | 29  |
|                                  | Genes down-regulated in Caco-2 cells (intestinal epithelium) after coculture with the probiotic bacteria L. casei for 6h.                                                                                   | 15  | 6.81669e-7  | 1.07885e-4  | 2.0919 | 52 | 588 | 0.35% | 38 | 173 |
|                                  | Selected gradually up-regulated genes whose expression profile follows that of HEMGN [Gene ID=55363] in the TLX1 [Gene ID=3195] Tet On iEBHX15-4 cells (pro-erythroblasts).                                 | 26  | 8.15062e-6  | 7.44215e-4  | 2.9924 | 21 | 166 | 0.14% | 10 | 30  |
|                                  | Genes from the blue module which are up-regulated in HAEC cells (primary aortic endothelium) after exposure to the oxidized 1-palmitoyl-2-arachidonyl-sn-3-glycerophosphorylcholine (oxPAPC).               | 30  | 1.19598e-5  | 9.46420e-4  | 2.0933 | 40 | 452 | 0.27% | 33 | 117 |
|                                  | Genes from the turquoise module which are up-regulated in HAEC cells (primary aortic endothelium) after exposure to the oxidized 1-palmitoyl-2-arachidonyl-sn-3-glycerophosphocholine (oxPAPC).             | 34  | 1.92442e-5  | 1.34370e-3  | 2.1974 | 34 | 366 | 0.23% | 27 | 72  |
|                                  | Selected gradually up-regulated genes whose expression profile follows that of HBZ [Gene ID=3050] in the TLX1 [Gene ID=3195] Tet On iEBHX15-4 cells (pro-erythroblasts).                                    | 37  | 2.25585e-5  | 1.44740e-3  | 2.5923 | 24 | 219 | 0.16% | 13 | 39  |
|                                  | Genes up-regulated in metaplastic carcinoma of the breast (MCB) subclass 2 compared to the MCB subclass 1.                                                                                                  | 43  | 4.56966e-5  | 2.52288e-3  | 2.6020 | 22 | 200 | 0.15% | 16 | 33  |
|                                  | Genes consistently up-regulated in HMEC cells (primary mammary epithelium) upon expression of TERT [Gene ID=7015] off a retroviral vector.                                                                  | 53  | 1.01940e-4  | 4.56615e-3  | 2.0207 | 34 | 398 | 0.23% | 26 | 131 |
|                                  | Genes commonly up-regulated in CD-1 and CD-2 clusters of multiple myeloma samples and which were higher expressed in the CD-1 group.                                                                        | 64  | 1.95376e-4  | 7.24724e-3  | 2.1432 | 27 | 298 | 0.18% | 21 | 77  |
|                                  | Genes up-regulated in HCT8/S11 cells (colon cancer) engineered to stably express NTN1 [Gene ID=1630] off a plasmid vector.                                                                                  | 65  | 2.00486e-4  | 7.32238e-3  | 2.8035 | 16 | 135 | 0.11% | 6  | 18  |
|                                  | Down-regulated in ovarian epithelial cells (MCV152) 72 hours following FSH treatment, compared to untreated                                                                                                 | 72  | 2.72828e-4  | 8.99574e-3  | 2.8386 | 15 | 125 | 0.10% | 11 | 47  |
|                                  | Genes down-regulated in poorly differentiated thyroid carcinoma (PDTC) compared to anaplastic thyroid carcinoma (ATC).                                                                                      | 78  | 3.61178e-4  | 1.09928e-2  | 2.0317 | 28 | 326 | 0.19% | 20 | 69  |
|                                  | Genes up-regulated in metastatic breast cancer tumors having type 2 amplification in the 20q13 region; involves MYBL2, STK6 and ZNF217 [Gene ID=4605, 6790, 7764]                                           | 81  | 3.98184e-4  | 1.16702e-2  | 2.0193 | 28 | 328 | 0.19% | 20 | 106 |
|                                  | Genes up-regulated in MCF10A cells (breast cancer) by expression of LSM1 [Gene ID=27257] off a letiviral vector.                                                                                            | 83  | 4.58474e-4  | 1.31135e-2  | 2.3191 | 20 | 204 | 0.13% | 13 | 40  |
|                                  | Genes whose expression peaked at 60 min after stimulation of MCF10A cells with EGF [Gene ID=1950].                                                                                                          | 89  | 5.10502e-4  | 1.36172e-2  | 2.4977 | 17 | 161 | 0.11% | 12 | 36  |
|                                  | Genes that cooperate with MYC [Gene ID=4609] and TBX2 [Gene ID=6909] to transform MEF cells (embryo fibroblasts).                                                                                           | 96  | 7.45735e-4  | 1.84414e-2  | 3.1349 | 11 | 83  | 0.07% | 7  | 11  |
|                                  | Genes down-regulated in A549 cells (lung cancer) expressing MIRLET7A3 [Gene ID=406883] microRNA off a plasmid vector.                                                                                       | 111 | 1.34133e-3  | 2.86876e-2  | 2.0076 | 23 | 271 | 0.15% | 19 | 77  |
|                                  | Genes up-regulated in MCF-7 cells (breast cancer) by selective estrogen receptor modulators (SERM) 4-hydroxytamoxifen, raloxifene, or ICI 182780 but not by estradiol [PubChem=44959, 5035, 3478439, 5757]. | 120 | 1.64532e-3  | 3.25500e-2  | 3.5705 | 8  | 53  | 0.05% | 7  | 19  |
|                                  | Amplification hot spot 25: colocalized fragile sites and cancer genes in the 2q13-q36 region.                                                                                                               | 122 | 2.00132e-3  | 3.89437e-2  | 2.9568 | 10 | 80  | 0.07% | 5  | 9   |
|                                  | Top genes up-regulated in subcutaneous tumors from highly metastatic pancreatic cancer cells.                                                                                                               | 126 | 2.32791e-3  | 4.38609e-2  | 2.0304 | 20 | 233 | 0.13% | 11 | 42  |
|                                  |                                                                                                                                                                                                             |     |             |             |        |    |     |       |    |     |
| MSigDB Predicted Promoter Motifs | Motif DGATADGAHWAGATA matches EVI1: ecotropic viral integration site 1                                                                                                                                      | 7   | 5.04266e-12 | 4.43034e-10 | 2.3594 | 78 | 782 | 0.52% | 54 | 186 |
|                                  | Motif NNAACAATNN matches SOX5: SRY (sex determining region Y)-box 5                                                                                                                                         | 9   | 9.85693e-12 | 6.73557e-10 | 2.2477 | 84 | 884 | 0.56% | 57 | 191 |

|                     |                                                                                                                                    |     |             |             |         |     |      |       |    |     |
|---------------------|------------------------------------------------------------------------------------------------------------------------------------|-----|-------------|-------------|---------|-----|------|-------|----|-----|
|                     | Motif YNGTNNNNATT (no known TF)                                                                                                    | 10  | 1.43755e-11 | 8.84090e-10 | 2.0614  | 101 | 1159 | 0.67% | 66 | 272 |
|                     | Motif TGATTTTRY matches GF11: growth factor independent 1                                                                          | 11  | 1.54359e-10 | 8.63005e-9  | 2.0957  | 87  | 982  | 0.58% | 63 | 233 |
|                     | Motif NNNNGTAAATAACA matches FOXC1: forkhead box C1                                                                                | 14  | 2.08805e-10 | 9.17251e-9  | 2.0929  | 86  | 972  | 0.57% | 61 | 191 |
|                     | Motif NNNNAACAATRGNN matches SOX9: SRY (sex determining region Y)-box 9 (campomelic dysplasia, autosomal sex-reversal)             | 17  | 4.17455e-10 | 1.51021e-8  | 2.1738  | 76  | 827  | 0.51% | 56 | 181 |
|                     | Motif NAWTGTTRTTT matches FOXD3: forkhead box D3                                                                                   | 20  | 2.29658e-9  | 7.06199e-8  | 2.1396  | 72  | 796  | 0.48% | 51 | 164 |
|                     | Motif NNNNNWATGCAATNNWNNA matches POU2F1: POU domain, class 2, transcription factor 1                                              | 22  | 5.16741e-9  | 1.44453e-7  | 2.1363  | 69  | 764  | 0.46% | 50 | 192 |
|                     | Motif NNNTGTTTANTR matches FOXJ1: forkhead box J1                                                                                  | 24  | 8.15527e-9  | 2.08979e-7  | 2.0521  | 74  | 853  | 0.49% | 44 | 170 |
|                     | Motif KGNANTRTTRYTTW matches FOXA2: forkhead box A2                                                                                | 29  | 2.98044e-8  | 6.32058e-7  | 2.0317  | 70  | 815  | 0.47% | 42 | 170 |
|                     | Motif CAGNYGKNAAA (no known TF)                                                                                                    | 31  | 4.56150e-8  | 9.04942e-7  | 2.9236  | 33  | 267  | 0.22% | 21 | 54  |
|                     | Motif NWATAAGTATWT matches NKX3-1: NK3 transcription factor related, locus 1 (Drosophila)                                          | 32  | 1.03760e-7  | 1.99413e-6  | 2.0762  | 61  | 695  | 0.41% | 49 | 177 |
|                     | Motif AGATAAGATAN matches EVI1: ecotropic viral integration site 1                                                                 | 53  | 1.01001e-6  | 1.17199e-5  | 2.0485  | 53  | 612  | 0.35% | 35 | 147 |
|                     | Motif TGCNHCWYCCYCATTAKTNNDCNMNHYCN matches HOXA5: homeobox A5                                                                     | 90  | 1.05074e-5  | 7.18002e-5  | 2.8593  | 22  | 182  | 0.15% | 15 | 31  |
|                     | Motif TGACAGKTTTAYGA matches MEIS1: Meis1, myeloid ecotropic viral integration site 1 homolog (mouse)&lt;br&gt; HOXA9: homeobox A9 | 94  | 1.39560e-5  | 9.13080e-5  | 2.1014  | 39  | 439  | 0.26% | 25 | 92  |
|                     | Motif CCYCNRRSTNGCGTGASA matches AHR: aryl hydrocarbon receptor                                                                    | 109 | 2.88204e-5  | 1.62610e-4  | 2.3175  | 29  | 296  | 0.19% | 16 | 65  |
|                     | Motif CCTGAGAATAATC matches ALX4: aristaless-like homeobox 4                                                                       | 187 | 4.87106e-4  | 1.60198e-3  | 3.2937  | 11  | 79   | 0.07% | 6  | 13  |
|                     | Motif CRGAARNNNCCGA (no known TF)                                                                                                  | 283 | 4.06047e-3  | 8.82400e-3  | 2.1768  | 15  | 163  | 0.10% | 15 | 35  |
|                     | Motif NNNTNNNGGTGANN matches PAX8: paired box gene 8                                                                               | 285 | 4.08169e-3  | 8.80787e-3  | 2.1144  | 16  | 179  | 0.11% | 8  | 26  |
|                     | Motif GCGSCMNTTT (no known TF)                                                                                                     | 324 | 7.74008e-3  | 1.46918e-2  | 2.0275  | 15  | 175  | 0.10% | 10 | 49  |
|                     |                                                                                                                                    |     |             |             |         |     |      |       |    |     |
| MSigDB miRNA Motifs | Targets of MicroRNA TTGCACT,MIR-130A,MIR-301,MIR-130B                                                                              | 1   | 9.08124e-13 | 2.00695e-10 | 2.0072  | 121 | 1426 | 0.81% | 82 | 328 |
|                     | Targets of MicroRNA TAGCTTT,MIR-9                                                                                                  | 7   | 9.57895e-9  | 3.02421e-7  | 2.0669  | 72  | 824  | 0.48% | 53 | 196 |
|                     | Targets of MicroRNA TTGGAGA,MIR-515-5P,MIR-519E                                                                                    | 9   | 1.71559e-8  | 4.21274e-7  | 2.3748  | 51  | 508  | 0.34% | 36 | 121 |
|                     | Targets of MicroRNA GACAGGG,MIR-339                                                                                                | 11  | 2.71086e-8  | 5.44636e-7  | 2.8291  | 36  | 301  | 0.24% | 21 | 53  |
|                     | Targets of MicroRNA CTCTGGA,MIR-520A,MIR-525                                                                                       | 13  | 6.92849e-8  | 1.17784e-6  | 2.1003  | 61  | 687  | 0.41% | 40 | 131 |
|                     | Targets of MicroRNA CAGCCTC,MIR-485-5P                                                                                             | 20  | 9.15782e-7  | 1.01194e-5  | 2.0552  | 53  | 610  | 0.35% | 39 | 116 |
|                     | Targets of MicroRNA AACATTC,MIR-409-3P                                                                                             | 21  | 1.24821e-6  | 1.31360e-5  | 2.2004  | 44  | 473  | 0.29% | 30 | 117 |
|                     | Targets of MicroRNA ATACAGG,MIR-486                                                                                                | 35  | 5.57217e-6  | 3.51843e-5  | 2.9737  | 22  | 175  | 0.15% | 14 | 48  |
|                     | Targets of MicroRNA CCATCCA,MIR-432                                                                                                | 40  | 8.90288e-6  | 4.91884e-5  | 2.6171  | 26  | 235  | 0.17% | 15 | 51  |
|                     | Targets of MicroRNA AAGGGAT,MIR-188                                                                                                | 41  | 9.18552e-6  | 4.95122e-5  | 2.3808  | 31  | 308  | 0.21% | 24 | 65  |
|                     | Targets of MicroRNA ATCATGA,MIR-433                                                                                                | 48  | 3.11490e-5  | 1.43415e-4  | 2.1744  | 33  | 359  | 0.22% | 23 | 92  |
|                     | Targets of MicroRNA TCTGATA,MIR-361                                                                                                | 49  | 3.49919e-5  | 1.57820e-4  | 2.3743  | 27  | 269  | 0.18% | 19 | 75  |
|                     | Targets of MicroRNA ATTACAT,MIR-380-3P                                                                                             | 55  | 7.40156e-5  | 2.97408e-4  | 2.2729  | 27  | 281  | 0.18% | 20 | 85  |
|                     | Targets of MicroRNA GCAAGAC,MIR-431                                                                                                | 71  | 4.10532e-4  | 1.27785e-3  | 2.5451  | 17  | 158  | 0.11% | 12 | 36  |
|                     | Targets of MicroRNA AGGAGTG,MIR-483                                                                                                | 72  | 4.54822e-4  | 1.39605e-3  | 2.0970  | 25  | 282  | 0.17% | 16 | 59  |
|                     | Targets of MicroRNA CGGTGTG,MIR-220                                                                                                | 80  | 1.45010e-3  | 4.00591e-3  | 3.6392  | 8   | 52   | 0.05% | 5  | 6   |
|                     | Targets of MicroRNA CACGTTT,MIR-302A                                                                                               | 89  | 2.47288e-3  | 6.14053e-3  | 2.7104  | 11  | 96   | 0.07% | 10 | 24  |
|                     | Targets of MicroRNA TCTAGAG,MIR-517                                                                                                | 102 | 6.19342e-3  | 1.34191e-2  | 2.0239  | 16  | 187  | 0.11% | 10 | 37  |
|                     | Targets of MicroRNA TACGGGT,MIR-99A,MIR-100,MIR-99B                                                                                | 111 | 9.85266e-3  | 1.96165e-2  | 2.1668  | 12  | 131  | 0.08% | 9  | 20  |
|                     | Targets of MicroRNA GTCAACC,MIR-380-5P                                                                                             | 123 | 1.72653e-2  | 3.10213e-2  | 2.4261  | 8   | 78   | 0.05% | 7  | 19  |
|                     |                                                                                                                                    |     |             |             |         |     |      |       |    |     |
| InterPro            | Molybdopterin synthase/thiamin biosynthesis sulphur carrier, beta-grasp                                                            | 8   | 1.54242e-5  | 1.53239e-2  | 18.9237 | 4   | 5    | 0.03% | 2  | 2   |
|                     | Homeodomain protein CUT                                                                                                            | 9   | 1.61096e-5  | 1.42266e-2  | 4.3670  | 12  | 65   | 0.08% | 6  | 7   |
|                     | K Homology                                                                                                                         | 10  | 1.68831e-5  | 1.34187e-2  | 2.8549  | 21  | 174  | 0.14% | 12 | 39  |
|                     | Lambda repressor-like, DNA-binding                                                                                                 | 11  | 3.35775e-5  | 2.42613e-2  | 2.6551  | 22  | 196  | 0.15% | 12 | 28  |
|                     | Pyridoxal phosphate-dependent decarboxylase                                                                                        | 13  | 5.90158e-5  | 3.60813e-2  | 6.6233  | 7   | 25   | 0.05% | 4  | 8   |
|                     | Ubiquitin-related modifier 1                                                                                                       | 14  | 7.55387e-5  | 4.28844e-2  | 23.6546 | 3   | 3    | 0.02% | 1  | 1   |
|                     | LCCL                                                                                                                               | 15  | 8.32193e-5  | 4.40951e-2  | 9.8561  | 5   | 12   | 0.03% | 3  | 6   |
|                     |                                                                                                                                    |     |             |             |         |     |      |       |    |     |
| TreeFam             | Zinc finger and BTB domain-containing protein 24                                                                                   | 1   | 2.63778e-6  | 2.10732e-2  | 16.8961 | 5   | 7    | 0.03% | 1  | 1   |
|                     | CUX2/ONECUT2/ONECUT1/CUX1/ONECUT3                                                                                                  | 2   | 4.05736e-6  | 1.62071e-2  | 5.4208  | 11  | 48   | 0.07% | 5  | 5   |
|                     | Mucin-17 precursor                                                                                                                 | 3   | 1.09606e-5  | 2.91880e-2  | 7.0088  | 8   | 27   | 0.05% | 1  | 1   |



|                    |                                               |   |            |            |        |    |     |       |    |    |
|--------------------|-----------------------------------------------|---|------------|------------|--------|----|-----|-------|----|----|
|                    | Zinc finger and BTB domain-containing protein | 4 | 1.65725e-5 | 3.30995e-2 | 7.8849 | 7  | 21  | 0.05% | 4  | 4  |
| HGNC Gene Families | CUT                                           | 1 | 1.61096e-5 | 7.90981e-3 | 4.3670 | 12 | 65  | 0.08% | 6  | 7  |
|                    | MUC                                           | 2 | 1.69869e-5 | 4.17029e-3 | 3.8065 | 14 | 87  | 0.09% | 3  | 16 |
|                    | ZBTB                                          | 3 | 8.61125e-5 | 1.40938e-2 | 2.2151 | 28 | 299 | 0.19% | 16 | 41 |

|                                                                                                                                  |                                                                                      |
|----------------------------------------------------------------------------------------------------------------------------------|--------------------------------------------------------------------------------------|
| The test set contains 14,977 (4%) of all 354,275 regions.                                                                        | The test set picked 2,666 genes, the background set picked 14,129 genes.             |
| <i>GO Molecular Function</i> has 3,402 terms covering 14,878 (84%) of all 17,635 genes.                                          | 3,402 ontology terms were tested (100%) using an annotation count range of [1, Inf]. |
| <i>GO Biological Process</i> has 8,762 terms covering 14,731 (84%) of all 17,635 genes.                                          | 8,762 ontology terms were tested (100%) using an annotation count range of [1, Inf]. |
| <i>GO Cellular Component</i> has 1,121 terms covering 16,374 (93%) of all 17,635 genes.                                          | 1,121 ontology terms were tested (100%) using an annotation count range of [1, Inf]. |
| <i>Mouse Phenotype</i> has 7,294 terms covering 6,429 (36%) of all 17,635 genes.                                                 | 7,294 ontology terms were tested (100%) using an annotation count range of [1, Inf]. |
| <i>Disease Ontology</i> has 2,234 terms covering 7,911 (45%) of all 17,635 genes.                                                | 2,234 ontology terms were tested (100%) using an annotation count range of [1, Inf]. |
| <i>MSigDB Cancer Neighborhood</i> has 427 terms covering 4,385 (25%) of all 17,635 genes.                                        | 427 ontology terms were tested (100%) using an annotation count range of [1, Inf].   |
| <i>PANTHER Pathway</i> has 140 terms covering 2,183 (12%) of all 17,635 genes.                                                   | 140 ontology terms were tested (100%) using an annotation count range of [1, Inf].   |
| <i>Pathway Commons</i> has 1,607 terms covering 6,072 (34%) of all 17,635 genes.                                                 | 1,607 ontology terms were tested (100%) using an annotation count range of [1, Inf]. |
| <i>MSigDB Pathway</i> has 880 terms covering 6,686 (38%) of all 17,635 genes.                                                    | 880 ontology terms were tested (100%) using an annotation count range of [1, Inf].   |
| <i>MGI Expression: Detected</i> has 8,348 terms covering 11,006 (62%) of all 17,635 genes.                                       | 8,348 ontology terms were tested (100%) using an annotation count range of [1, Inf]. |
| <i>MSigDB Perturbation</i> has 2,374 terms covering 16,270 (92%) of all 17,635 genes.                                            | 2,374 ontology terms were tested (100%) using an annotation count range of [1, Inf]. |
| <i>MSigDB Predicted Promoter Motifs</i> has 615 terms covering 8,958 (51%) of all 17,635 genes.                                  | 615 ontology terms were tested (100%) using an annotation count range of [1, Inf].   |
| <i>MSigDB miRNA Motifs</i> has 221 terms covering 6,031 (34%) of all 17,635 genes.                                               | 221 ontology terms were tested (100%) using an annotation count range of [1, Inf].   |
| <i>InterPro</i> has 7,948 terms covering 16,411 (93%) of all 17,635 genes.                                                       | 7,948 ontology terms were tested (100%) using an annotation count range of [1, Inf]. |
| <i>TreeFam</i> has 7,989 terms covering 16,523 (94%) of all 17,635 genes.                                                        | 7,989 ontology terms were tested (100%) using an annotation count range of [1, Inf]. |
| <i>HGNC Gene Families</i> has 491 terms covering 6,911 (39%) of all 17,635 genes.                                                | 491 ontology terms were tested (100%) using an annotation count range of [1, Inf].   |
| GREAT version 2.0.2                                                                                                              |                                                                                      |
| Species assembly: hg18                                                                                                           |                                                                                      |
| Association rule: Basal+extension: 5000 bp upstream, 5000 bp downstream, 0 bp max extension, curated regulatory domains included |                                                                                      |
